# Supplementary figures and images for: Genetic activation of Nrf2 signaling is sufficient to ameliorate neurodegenerative phenotypes in a Drosophila model of Parkinson’s disease
Source: PubMed Central journal article supplement — Dis Model Mech. 2011 Jun 30;4(5):701–7. doi: 10.1242/dmm.007575 (PMC3180234; doi:10.1242/dmm.007575), 2011-06-30

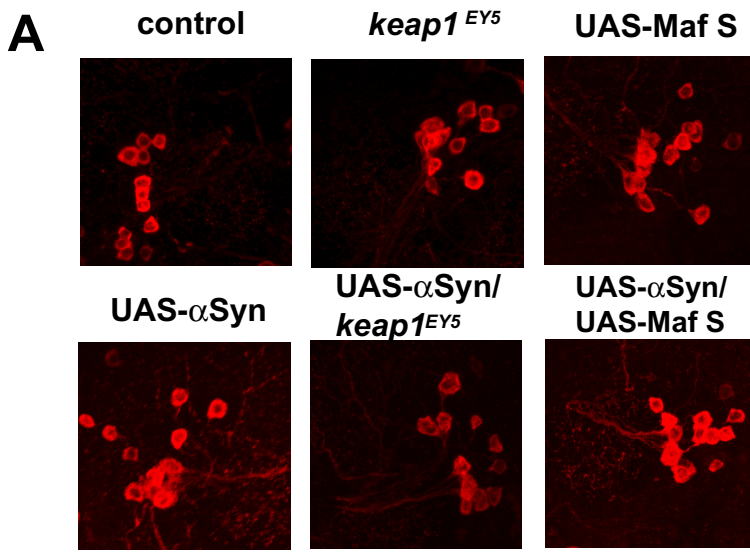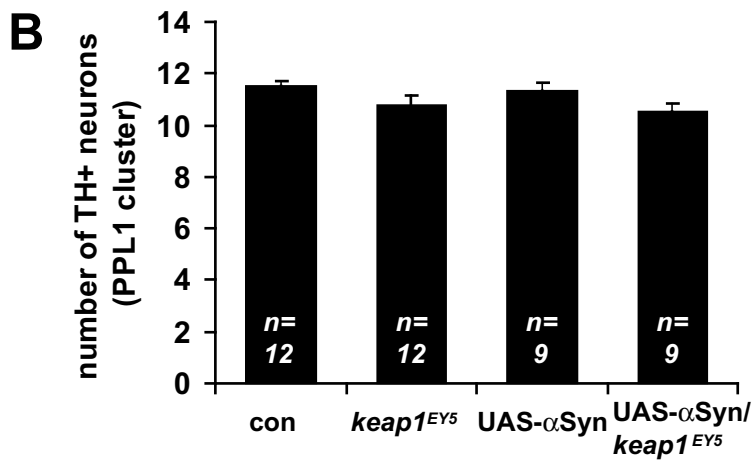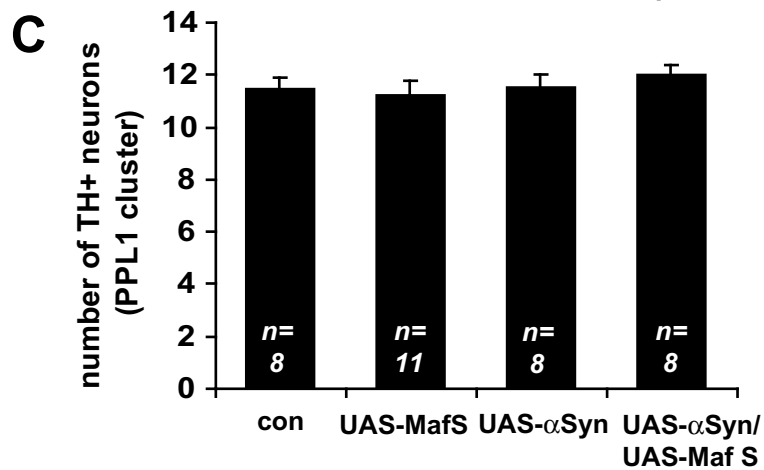

FIG. S1

Supplement: supp_007575_DMM007575FigS1.pdf [file supp_007575_DMM007575FigS1.pdf]
